# Supplementary material
Source: HighWire-hosted journal article supplement (https://www.cmaj.ca/content/suppl/2002/04/05/165.5.626)
Supplement: prq28.pdf [file prq28.pdf]

## **CMAJ - Canadian Medical Association Journal**

Results from the CMA's 2001 Physician Resource Questionnaire

### **Change to net professional income**

During the last 12 months, has your net professional income:

|                  | <b>Number of Respondents</b> | <b>Increased</b> | <b>Stayed about the same</b> | <b>Decreased</b> | <b>No response</b> | <b>Total</b> |
|------------------|------------------------------|------------------|------------------------------|------------------|--------------------|--------------|
| <b>Overall</b>   | 3246                         | 24.7%            | 44.5%                        | 25.9%            | 4.8%               | 100%         |
| <b>Female</b>    | 992                          | 25.8%            | 46.7%                        | 23.0%            | 4.5%               | 100%         |
| <b>Male</b>      | 2254                         | 24.2%            | 43.6%                        | 27.2%            | 5.0%               | 100%         |
| <b>&lt; 35</b>   | 284                          | 38.4%            | 40.8%                        | 16.5%            | 4.2%               | 100%         |
| <b>35 - 44</b>   | 903                          | 28.0%            | 45.4%                        | 21.9%            | 4.7%               | 100%         |
| <b>45 - 54</b>   | 1101                         | 24.8%            | 45.7%                        | 25.2%            | 4.3%               | 100%         |
| <b>55 - 64</b>   | 653                          | 20.8%            | 45.3%                        | 28.6%            | 5.2%               | 100%         |
| <b>65+</b>       | 305                          | 10.2%            | 39.3%                        | 43.3%            | 7.2%               | 100%         |
| <b>GP/FP</b>     | 1592                         | 22.6%            | 44.1%                        | 28.6%            | 4.7%               | 100%         |
| <b>Med Spec</b>  | 1203                         | 28.8%            | 45.6%                        | 20.1%            | 5.4%               | 100%         |
| <b>Surg Spec</b> | 451                          | 21.1%            | 43.0%                        | 32.2%            | 3.8%               | 100%         |
| <b>Rural</b>     | 283                          | 27.2%            | 44.5%                        | 24.4%            | 3.9%               | 100%         |
| <b>Urban</b>     | 2963                         | 24.5%            | 44.5%                        | 26.1%            | 4.9%               | 100%         |
