# Supplementary material
Source: HighWire-hosted journal article supplement (https://www.cmaj.ca/content/suppl/2002/04/05/165.5.626)
Supplement: tables.pdf [file tables.pdf]

## ***CMAJ - Canadian Medical Association Journal***

### Results from the CMA's 2001 Physician Resource Questionnaire

#### **Personal Computer Use**

Do you personally use a computer? If no, do you plan to do so in the next 12 months?

|                            | <b>Personal Computer Use</b> |            |           |                    |              | <b>% of the NOs who plan to do so in the next 12 months</b> |
|----------------------------|------------------------------|------------|-----------|--------------------|--------------|-------------------------------------------------------------|
|                            | <b>Number of respondents</b> | <b>Yes</b> | <b>No</b> | <b>No response</b> | <b>Total</b> |                                                             |
| <b>Overall</b>             | 3246                         | 88.3%      | 11.2%     | 0.5%               | 100%         | 41.4%                                                       |
| <b>Female</b>              | 992                          | 86.3%      | 13.2%     | 0.5%               | 100%         | 43.5%                                                       |
| <b>Male</b>                | 2254                         | 89.2%      | 10.4%     | 0.4%               | 100%         | 40.2%                                                       |
| <b>&lt; 35</b>             | 284                          | 92.3%      | 7.4%      | 0.4%               | 100%         | 52.4%                                                       |
| <b>35 - 44</b>             | 903                          | 93.1%      | 6.9%      | 0.0%               | 100%         | 45.2%                                                       |
| <b>45 - 54</b>             | 1101                         | 89.5%      | 10.3%     | 0.3%               | 100%         | 44.2%                                                       |
| <b>55 - 64</b>             | 653                          | 84.8%      | 14.4%     | 0.8%               | 100%         | 37.2%                                                       |
| <b>65+</b>                 | 305                          | 73.4%      | 24.6%     | 2.0%               | 100%         | 36.0%                                                       |
| <b>GP/FP</b>               | 1592                         | 84.9%      | 14.5%     | 0.6%               | 100%         | 37.2%                                                       |
| <b>Medical Specialist</b>  | 1203                         | 91.8%      | 7.9%      | 0.3%               | 100%         | 44.2%                                                       |
| <b>Surgical Specialist</b> | 451                          | 91.1%      | 8.6%      | 0.2%               | 100%         | 59.0%                                                       |
| <b>Rural</b>               | 283                          | 86.2%      | 13.4%     | 0.4%               | 100%         | 47.4%                                                       |
| <b>Urban</b>               | 2963                         | 88.5%      | 11.0%     | 0.5%               | 100%         | 40.7%                                                       |

## **CMAJ - Canadian Medical Association Journal**

Results from the CMA's 2001 Physician Resource Questionnaire

### **Computer Use by Activity**

Proportion of physicians who personally use a computer for various purposes

|                                                                                  | <b>Overall</b> | <b>Female</b> | <b>Male</b> | <b>&lt; 35</b> | <b>35-44</b> | <b>45-54</b> | <b>55-64</b> | <b>65+</b> | <b>GP/FP</b> | <b>Med Spec</b> | <b>Surg Spec</b> | <b>Rural</b> | <b>Urban</b> |
|----------------------------------------------------------------------------------|----------------|---------------|-------------|----------------|--------------|--------------|--------------|------------|--------------|-----------------|------------------|--------------|--------------|
| <b>Number of respondents</b>                                                     | 3246           | 992           | 2254        | 284            | 903          | 1101         | 653          | 305        | 1592         | 1203            | 451              | 283          | 2963         |
| <b>Electronic billing</b>                                                        | 14.0%          | 10.4%         | 15.7%       | 12.3%          | 12.2%        | 16.9%        | 14.2%        | 10.5%      | 12.9%        | 14.5%           | 17.1%            | 9.9%         | 14.4%        |
| <b>Electronic patient records</b>                                                | 13.8%          | 11.8%         | 14.7%       | 16.5%          | 14.8%        | 14.4%        | 12.1%        | 9.8%       | 10.8%        | 18.1%           | 12.9%            | 12.0%        | 14.0%        |
| <b>General office management (e.g. word processing)</b>                          | 28.8%          | 24.3%         | 30.8%       | 29.6%          | 32.7%        | 31.4%        | 24.3%        | 17.0%      | 26.1%        | 34.2%           | 23.9%            | 24.0%        | 29.3%        |
| <b>Decision aids in patient management (e.g. checking for drug interactions)</b> | 25.4%          | 22.4%         | 26.8%       | 32.4%          | 27.4%        | 25.8%        | 23.6%        | 16.1%      | 23.7%        | 29.3%           | 21.3%            | 23.7%        | 25.6%        |
| <b>Electronic mail</b>                                                           | 70.6%          | 69.0%         | 71.4%       | 83.8%          | 77.5%        | 70.9%        | 66.0%        | 46.9%      | 64.2%        | 79.1%           | 70.7%            | 64.7%        | 71.2%        |
| <b>CD ROM professional resources (all types)</b>                                 | 47.6%          | 37.3%         | 52.1%       | 47.2%          | 52.0%        | 50.0%        | 44.3%        | 32.8%      | 39.6%        | 55.8%           | 53.9%            | 42.4%        | 48.1%        |
| <b>CME on diskette or CD-ROM</b>                                                 | 41.3%          | 33.1%         | 45.0%       | 38.7%          | 43.9%        | 41.7%        | 41.7%        | 34.4%      | 30.4%        | 51.9%           | 51.9%            | 33.6%        | 42.1%        |

## **CMAJ - Canadian Medical Association Journal**

Results from the CMA's 2001 Physician Resource Questionnaire

### **Personal Digital Assistant Use**

Do you use a personal digital assistant or wireless device (e.g. Palm Pilot) in clinical practice?

|                            | <b>Number of respondents</b> | <b>Yes</b> | <b>No</b> | <b>Don't Know</b> | <b>No Response</b> | <b>Total</b> |
|----------------------------|------------------------------|------------|-----------|-------------------|--------------------|--------------|
| <b>Overall</b>             | 3246                         | 19.3%      | 78.6%     | 0.8%              | 1.3%               | 100%         |
| <b>Female</b>              | 992                          | 15.4%      | 82.1%     | 1.4%              | 1.1%               | 100%         |
| <b>Male</b>                | 2254                         | 21.0%      | 77.1%     | 0.5%              | 1.4%               | 100%         |
| <b>&lt; 35</b>             | 284                          | 26.8%      | 69.7%     | 2.1%              | 1.4%               | 100%         |
| <b>35 - 44</b>             | 903                          | 20.8%      | 78.3%     | 0.4%              | 0.4%               | 100%         |
| <b>45 - 54</b>             | 1101                         | 19.6%      | 78.7%     | 0.5%              | 1.3%               | 100%         |
| <b>55 - 64</b>             | 653                          | 17.5%      | 80.1%     | 0.8%              | 1.7%               | 100%         |
| <b>65+</b>                 | 305                          | 10.8%      | 84.3%     | 1.6%              | 3.3%               | 100%         |
| <b>GP/FP</b>               | 1592                         | 15.7%      | 81.5%     | 1.3%              | 1.6%               | 100%         |
| <b>Medical Specialist</b>  | 1203                         | 22.9%      | 75.6%     | 0.2%              | 1.2%               | 100%         |
| <b>Surgical Specialist</b> | 451                          | 22.4%      | 76.3%     | 0.4%              | 0.9%               | 100%         |
| <b>Rural</b>               | 283                          | 13.4%      | 83.0%     | 1.4%              | 2.1%               | 100%         |
| <b>Urban</b>               | 2963                         | 19.9%      | 78.2%     | 0.7%              | 1.2%               | 100%         |

## **CMAJ - Canadian Medical Association Journal**

### Results from the CMA's 2001 Physician Resource Questionnaire

#### **Personal Internet Use**

Do you personally use the Internet? If no, do you plan to do so in the next 12 months?

|                            | <b>Personal Internet Use</b> |            |           |                    |              | <b>% of the NOs who plan to do so in the next 12 months</b> |
|----------------------------|------------------------------|------------|-----------|--------------------|--------------|-------------------------------------------------------------|
|                            | <b>Number of respondents</b> | <b>Yes</b> | <b>No</b> | <b>No response</b> | <b>Total</b> |                                                             |
| <b>Overall</b>             | 3246                         | 83.6%      | 15.9%     | 0.5%               | 100%         | 42.9%                                                       |
| <b>Female</b>              | 992                          | 81.3%      | 18.5%     | 0.2%               | 100%         | 47.3%                                                       |
| <b>Male</b>                | 2254                         | 84.7%      | 14.7%     | 0.6%               | 100%         | 40.5%                                                       |
| <b>&lt; 35</b>             | 284                          | 92.3%      | 7.4%      | 0.4%               | 100%         | 57.1%                                                       |
| <b>35 - 44</b>             | 903                          | 88.5%      | 11.5%     | 0.0%               | 100%         | 53.8%                                                       |
| <b>45 - 54</b>             | 1101                         | 85.1%      | 14.6%     | 0.3%               | 100%         | 40.4%                                                       |
| <b>55 - 64</b>             | 653                          | 79.9%      | 19.0%     | 1.1%               | 100%         | 41.9%                                                       |
| <b>65+</b>                 | 305                          | 63.9%      | 34.4%     | 1.6%               | 100%         | 34.3%                                                       |
| <b>GP/FP</b>               | 1592                         | 78.4%      | 21.2%     | 0.4%               | 100%         | 42.3%                                                       |
| <b>Medical Specialist</b>  | 1203                         | 89.1%      | 10.1%     | 0.7%               | 100%         | 41.0%                                                       |
| <b>Surgical Specialist</b> | 451                          | 87.6%      | 12.2%     | 0.2%               | 100%         | 50.9%                                                       |
| <b>Rural</b>               | 283                          | 81.3%      | 18.4%     | 0.4%               | 100%         | 38.5%                                                       |
| <b>Urban</b>               | 2963                         | 83.9%      | 15.6%     | 0.5%               | 100%         | 43.4%                                                       |

## **CMAJ - Canadian Medical Association Journal**

Results from the CMA's 2001 Physician Resource Questionnaire

### **Internet Use by Activity, All Locations**

Physicians who use the Internet for various activities, all locations combined (including home), as a proportion of all respondents

|                                                    | <b>Overall</b> | <b>Female</b> | <b>Male</b> | <b>&lt; 35</b> | <b>35 - 44</b> | <b>45 - 54</b> | <b>55 - 64</b> | <b>65+</b> | <b>GP/FP</b> | <b>Med Spec</b> | <b>Surg Spec</b> | <b>Rural</b> | <b>Urban</b> |
|----------------------------------------------------|----------------|---------------|-------------|----------------|----------------|----------------|----------------|------------|--------------|-----------------|------------------|--------------|--------------|
| <b>Number of respondents</b>                       | 3246           | 992           | 2254        | 284            | 903            | 1101           | 653            | 305        | 1592         | 1203            | 451              | 283          | 2963         |
| <b>Email</b>                                       | 80.6%          | 77.6%         | 81.9%       | 90.5%          | 85.2%          | 82.3%          | 76.4%          | 60.3%      | 75.2%        | 86.3%           | 84.3%            | 76.3%        | 81.0%        |
| <b>Worldwide web</b>                               | 76.8%          | 71.9%         | 79.0%       | 87.3%          | 83.7%          | 78.7%          | 70.4%          | 53.4%      | 71.2%        | 82.8%           | 80.7%            | 74.2%        | 77.1%        |
| <b>Discussion Groups</b>                           | 15.3%          | 11.9%         | 16.9%       | 13.4%          | 16.2%          | 16.7%          | 15.9%          | 8.5%       | 12.9%        | 17.2%           | 19.1%            | 14.5%        | 15.4%        |
| <b>Ordering documents, books</b>                   | 36.8%          | 27.5%         | 40.9%       | 41.2%          | 41.3%          | 38.1%          | 33.2%          | 23.0%      | 32.0%        | 41.6%           | 41.2%            | 36.0%        | 36.9%        |
| <b>MEDLINE searching</b>                           | 66.5%          | 62.2%         | 68.5%       | 77.1%          | 69.8%          | 67.4%          | 63.7%          | 50.2%      | 55.7%        | 77.5%           | 75.6%            | 60.8%        | 67.1%        |
| <b>Browsing or reading online medical journals</b> | 54.6%          | 45.6%         | 58.6%       | 59.9%          | 57.7%          | 54.9%          | 53.1%          | 42.6%      | 47.0%        | 63.2%           | 58.5%            | 50.2%        | 55.0%        |
| <b>CME courses online</b>                          | 23.3%          | 17.4%         | 25.8%       | 21.1%          | 23.1%          | 24.2%          | 24.8%          | 19.0%      | 18.1%        | 28.6%           | 27.3%            | 20.8%        | 23.5%        |
| <b>CMA Online</b>                                  | 29.6%          | 21.7%         | 33.1%       | 34.2%          | 31.3%          | 29.5%          | 27.6%          | 24.6%      | 29.3%        | 30.3%           | 28.6%            | 36.0%        | 29.0%        |
| <b>CMA CPG Infobase</b>                            | 16.3%          | 12.4%         | 18.0%       | 19.7%          | 17.4%          | 16.7%          | 13.3%          | 14.4%      | 17.1%        | 16.0%           | 14.2%            | 17.3%        | 16.2%        |
| <b>Classified ads, placements</b>                  | 9.5%           | 7.4%          | 10.4%       | 14.1%          | 11.2%          | 9.5%           | 7.4%           | 4.6%       | 9.3%         | 9.5%            | 10.2%            | 10.2%        | 9.4%         |
| <b>Other physician-oriented web sites</b>          | 42.1%          | 36.1%         | 44.8%       | 53.5%          | 46.3%          | 44.8%          | 35.8%          | 23.0%      | 38.6%        | 45.8%           | 44.6%            | 42.8%        | 42.1%        |
| <b>News in medicine, health care</b>               | 34.0%          | 28.3%         | 36.6%       | 34.5%          | 33.9%          | 35.8%          | 32.8%          | 30.5%      | 31.6%        | 36.7%           | 35.7%            | 31.8%        | 34.3%        |
| <b>Patient-oriented web sites</b>                  | 21.2%          | 21.1%         | 21.2%       | 22.9%          | 22.8%          | 23.4%          | 18.4%          | 12.5%      | 20.9%        | 22.4%           | 18.8%            | 22.3%        | 21.1%        |
| <b>Financial activities</b>                        | 40.3%          | 32.6%         | 43.7%       | 56.3%          | 44.5%          | 40.2%          | 34.0%          | 26.2%      | 38.4%        | 41.1%           | 44.8%            | 39.9%        | 40.3%        |

**CMAJ - Canadian Medical Association Journal**  
**Results from the CMA's 2001 Physician Resource Questionnaire**

**Internet Use by Activity, Professional Location**

Physicians who use the Internet for various activities at a professional location (excluding home), as a proportion of all respondents

|                                                    | Overall | Female | Male  | < 35  | 35 - 44 | 45 - 54 | 55 - 64 | 65+   | GP/FP | Med Spec | Surg Spec | Rural | Urban |
|----------------------------------------------------|---------|--------|-------|-------|---------|---------|---------|-------|-------|----------|-----------|-------|-------|
| <b>Number of respondents</b>                       | 3246    | 992    | 2254  | 284   | 903     | 1101    | 653     | 305   | 1592  | 1203     | 451       | 283   | 2963  |
| <b>Email</b>                                       | 39.0%   | 32.7%  | 41.8% | 38.7% | 41.6%   | 43.3%   | 34.6%   | 25.2% | 27.4% | 53.8%    | 40.4%     | 30.4% | 39.8% |
| <b>Worldwide web</b>                               | 37.2%   | 29.9%  | 40.5% | 45.4% | 41.5%   | 40.2%   | 31.2%   | 19.0% | 26.5% | 51.4%    | 37.5%     | 32.9% | 37.7% |
| <b>Discussion Groups</b>                           | 6.0%    | 5.1%   | 6.3%  | 4.2%  | 6.0%    | 6.8%    | 6.1%    | 4.3%  | 4.0%  | 8.4%     | 6.4%      | 5.3%  | 6.0%  |
| <b>Ordering documents, books</b>                   | 13.6%   | 7.8%   | 16.2% | 10.9% | 15.2%   | 15.3%   | 12.3%   | 8.9%  | 8.6%  | 19.6%    | 15.5%     | 11.3% | 13.9% |
| <b>MEDLINE searching</b>                           | 37.6%   | 32.3%  | 40.0% | 45.4% | 42.1%   | 39.3%   | 33.8%   | 19.3% | 25.4% | 53.1%    | 39.5%     | 31.4% | 38.2% |
| <b>Browsing or reading online medical journals</b> | 26.0%   | 20.4%  | 28.5% | 28.2% | 27.5%   | 28.7%   | 24.0%   | 14.1% | 17.1% | 39.0%    | 22.6%     | 18.0% | 26.8% |
| <b>CME courses online</b>                          | 8.2%    | 5.9%   | 9.2%  | 6.7%  | 7.8%    | 9.6%    | 8.7%    | 4.6%  | 4.6%  | 12.6%    | 9.1%      | 4.6%  | 8.5%  |
| <b>CMA Online</b>                                  | 11.1%   | 7.3%   | 12.7% | 11.6% | 11.7%   | 12.1%   | 9.6%    | 7.9%  | 9.8%  | 13.6%    | 8.6%      | 11.7% | 11.0% |
| <b>CMA CPG Infobase</b>                            | 7.0%    | 4.7%   | 8.0%  | 6.7%  | 7.3%    | 8.0%    | 5.2%    | 6.9%  | 6.5%  | 8.2%     | 5.5%      | 7.1%  | 7.0%  |
| <b>Classified ads, placements</b>                  | 3.7%    | 2.4%   | 4.2%  | 6.0%  | 4.0%    | 3.5%    | 2.9%    | 2.6%  | 3.1%  | 4.3%     | 3.8%      | 3.9%  | 3.6%  |
| <b>Other physician-oriented web sites</b>          | 18.7%   | 15.2%  | 20.2% | 26.1% | 21.0%   | 20.5%   | 14.1%   | 7.9%  | 14.1% | 25.4%    | 16.6%     | 17.0% | 18.8% |
| <b>News in medicine, health care</b>               | 14.1%   | 9.9%   | 16.0% | 12.7% | 14.0%   | 16.6%   | 12.7%   | 9.8%  | 10.3% | 19.9%    | 12.2%     | 12.0% | 14.3% |
| <b>Patient-oriented web sites</b>                  | 10.1%   | 7.8%   | 11.1% | 12.0% | 10.1%   | 11.5%   | 8.6%    | 6.6%  | 8.3%  | 13.5%    | 7.5%      | 9.9%  | 10.1% |
| <b>Financial activities</b>                        | 7.3%    | 3.2%   | 9.1%  | 7.7%  | 7.2%    | 7.8%    | 7.5%    | 4.9%  | 4.9%  | 9.6%     | 9.5%      | 7.1%  | 7.3%  |

## ***CMAJ - Canadian Medical Association Journal***

### Results from the CMA's 2001 Physician Resource Questionnaire

#### **Internet Use by Main Location**

Considering all activities on the Internet, where do you spend the most time online?  
(Includes only those who use the Internet)

|                            | <b>Number of respondents</b> | <b>Home</b> | <b>Office or Clinical Practice</b> | <b>Hospital</b> | <b>Other</b> | <b>No Response</b> | <b>Total</b> |
|----------------------------|------------------------------|-------------|------------------------------------|-----------------|--------------|--------------------|--------------|
| <b>Overall</b>             | 2715                         | 77.9%       | 13.7%                              | 5.8%            | 0.6%         | 2.0%               | 100%         |
| <b>Female</b>              | 806                          | 77.7%       | 13.2%                              | 6.0%            | 1.0%         | 2.2%               | 100%         |
| <b>Male</b>                | 1909                         | 77.9%       | 14.0%                              | 5.7%            | 0.4%         | 1.9%               | 100%         |
| <b>&lt; 35</b>             | 262                          | 81.3%       | 11.1%                              | 6.9%            | 0.4%         | 0.4%               | 100%         |
| <b>35 - 44</b>             | 799                          | 78.8%       | 14.1%                              | 5.5%            | 0.6%         | 0.9%               | 100%         |
| <b>45 - 54</b>             | 937                          | 76.8%       | 14.5%                              | 5.9%            | 0.3%         | 2.5%               | 100%         |
| <b>55 - 64</b>             | 522                          | 74.7%       | 13.4%                              | 7.1%            | 1.0%         | 3.8%               | 100%         |
| <b>65+</b>                 | 195                          | 82.6%       | 12.8%                              | 1.5%            | 1.0%         | 2.1%               | 100%         |
| <b>GP/FP</b>               | 1248                         | 84.9%       | 10.9%                              | 2.3%            | 0.8%         | 1.0%               | 100%         |
| <b>Medical Specialist</b>  | 1072                         | 70.0%       | 16.0%                              | 10.6%           | 0.3%         | 3.1%               | 100%         |
| <b>Surgical Specialist</b> | 395                          | 77.0%       | 16.5%                              | 3.5%            | 0.8%         | 2.3%               | 100%         |
| <b>Rural</b>               | 230                          | 84.3%       | 12.2%                              | 1.7%            | 0.9%         | 0.9%               | 100%         |
| <b>Urban</b>               | 2485                         | 77.3%       | 13.9%                              | 6.2%            | 0.6%         | 2.1%               | 100%         |

## **CMAJ - Canadian Medical Association Journal**

### Results from the CMA's 2001 Physician Resource Questionnaire

#### **Referring patients to medical web sites**

How often do you refer patients to medical web sites?

|                            | <b>Number of respondents</b> | <b>Daily</b> | <b>Weekly</b> | <b>Monthly</b> | <b>Occasionally</b> | <b>Never</b> | <b>No Response</b> | <b>Total</b> |
|----------------------------|------------------------------|--------------|---------------|----------------|---------------------|--------------|--------------------|--------------|
| <b>Overall</b>             | 3246                         | 3.1%         | 11.2%         | 3.8%           | 30.3%               | 48.0%        | 3.6%               | 100%         |
| <b>Female</b>              | 992                          | 2.7%         | 10.7%         | 3.8%           | 31.7%               | 48.3%        | 2.8%               | 100%         |
| <b>Male</b>                | 2254                         | 3.3%         | 11.4%         | 3.7%           | 29.7%               | 47.9%        | 3.9%               | 100%         |
| <b>&lt; 35</b>             | 284                          | 1.4%         | 10.2%         | 5.3%           | 35.2%               | 47.2%        | 0.7%               | 100%         |
| <b>35 - 44</b>             | 903                          | 3.7%         | 11.2%         | 4.9%           | 32.9%               | 45.3%        | 2.1%               | 100%         |
| <b>45 - 54</b>             | 1101                         | 4.3%         | 12.5%         | 3.8%           | 28.7%               | 47.3%        | 3.4%               | 100%         |
| <b>55 - 64</b>             | 653                          | 2.0%         | 11.5%         | 2.8%           | 29.9%               | 48.4%        | 5.5%               | 100%         |
| <b>65+</b>                 | 305                          | 1.3%         | 6.9%          | 1.0%           | 24.9%               | 58.4%        | 7.5%               | 100%         |
| <b>GP/FP</b>               | 1592                         | 2.6%         | 11.0%         | 4.0%           | 31.8%               | 46.8%        | 3.8%               | 100%         |
| <b>Medical Specialist</b>  | 1203                         | 3.3%         | 10.6%         | 3.5%           | 29.0%               | 50.0%        | 3.6%               | 100%         |
| <b>Surgical Specialist</b> | 451                          | 4.4%         | 13.7%         | 3.5%           | 28.6%               | 46.8%        | 2.9%               | 100%         |
| <b>Rural</b>               | 283                          | 1.4%         | 11.0%         | 3.2%           | 31.8%               | 49.8%        | 2.8%               | 100%         |
| <b>Urban</b>               | 2963                         | 3.3%         | 11.2%         | 3.8%           | 30.2%               | 47.8%        | 3.7%               | 100%         |



## **CMAJ - Canadian Medical Association Journal**

Results from the CMA's 2001 Physician Resource Questionnaire

### **Types of medical web sites to which physicians refer patients**

Proportion of physicians who refer patients to particular types of Web sites

(includes only those who said they refer patients to medical Web sites at least occasionally)

|                                  | <b>Overall</b> | <b>Female</b> | <b>Male</b> | <b>&lt; 35</b> | <b>35 - 44</b> | <b>45 - 54</b> | <b>55 - 64</b> | <b>65+</b> | <b>GP/FP</b> | <b>Med Spec</b> | <b>Surg Spec</b> | <b>Rural</b> | <b>Urban</b> |
|----------------------------------|----------------|---------------|-------------|----------------|----------------|----------------|----------------|------------|--------------|-----------------|------------------|--------------|--------------|
| <b>Number of respondents</b>     | 1571           | 485           | 1086        | 148            | 475            | 543            | 301            | 104        | 786          | 558             | 227              | 134          | 1437         |
| <b>Disease-specific sites</b>    | 77.3%          | 77.7%         | 77.1%       | 73.6%          | 80.2%          | 79.6%          | 71.8%          | 73.1%      | 76.5%        | 79.9%           | 73.9%            | 80.6%        | 77.0%        |
| <b>Government sites</b>          | 30.6%          | 31.5%         | 30.1%       | 33.1%          | 30.5%          | 32.4%          | 26.9%          | 27.9%      | 36.9%        | 28.1%           | 14.5%            | 39.6%        | 29.7%        |
| <b>Commercial health sites</b>   | 8.0%           | 4.7%          | 9.4%        | 4.7%           | 6.3%           | 9.2%           | 9.6%           | 8.7%       | 8.7%         | 7.5%            | 6.6%             | 8.2%         | 7.9%         |
| <b>Medical association sites</b> | 19.9%          | 18.1%         | 20.6%       | 21.6%          | 19.2%          | 19.9%          | 17.6%          | 26.9%      | 18.6%        | 20.4%           | 22.9%            | 15.7%        | 20.3%        |
| <b>Consumer group sites</b>      | 20.5%          | 22.5%         | 19.6%       | 12.2%          | 16.2%          | 25.6%          | 24.3%          | 14.4%      | 20.7%        | 20.3%           | 20.3%            | 23.1%        | 20.3%        |
| <b>Other sites</b>               | 9.4%           | 9.7%          | 9.2%        | 9.5%           | 8.8%           | 8.1%           | 11.6%          | 11.5%      | 8.7%         | 8.6%            | 13.7%            | 8.2%         | 9.5%         |

## ***CMAJ - Canadian Medical Association Journal***

Results from the CMA's 2001 Physician Resource Questionnaire

### **Canadian versus American/international sites**

Do you tend to recommend Canadian Web sites rather than American or other international Web sites?

(includes only those who said they refer patients to web sites)

|                            | <b>Number of respondents</b> | <b>Yes</b> | <b>No</b> | <b>No Response</b> | <b>Total</b> |
|----------------------------|------------------------------|------------|-----------|--------------------|--------------|
| <b>Overall</b>             | 1571                         | 49.7%      | 36.1%     | 14.2%              | 100%         |
| <b>Female</b>              | 485                          | 54.8%      | 27.8%     | 17.3%              | 100%         |
| <b>Male</b>                | 1086                         | 47.4%      | 39.8%     | 12.8%              | 100%         |
| <b>&lt; 35</b>             | 148                          | 57.4%      | 32.4%     | 10.1%              | 100%         |
| <b>35 - 44</b>             | 475                          | 50.3%      | 35.8%     | 13.9%              | 100%         |
| <b>45 - 54</b>             | 543                          | 49.2%      | 38.7%     | 12.2%              | 100%         |
| <b>55 - 64</b>             | 301                          | 47.2%      | 35.2%     | 17.6%              | 100%         |
| <b>65+</b>                 | 104                          | 46.2%      | 31.7%     | 22.1%              | 100%         |
| <b>GP/FP</b>               | 786                          | 57.3%      | 28.9%     | 13.9%              | 100%         |
| <b>Medical Specialist</b>  | 558                          | 43.4%      | 42.8%     | 13.8%              | 100%         |
| <b>Surgical Specialist</b> | 227                          | 39.2%      | 44.5%     | 16.3%              | 100%         |
| <b>Rural</b>               | 134                          | 56.0%      | 24.6%     | 19.4%              | 100%         |
| <b>Urban</b>               | 1437                         | 49.1%      | 37.2%     | 13.7%              | 100%         |

## **CMAJ - Canadian Medical Association Journal**

Results from the CMA's 2001 Physician Resource Questionnaire

### **Preference for Canadian medical Web sites**

Reasons for recommending Canadian Web sites rather than American or other international Web sites  
(includes only those who said they tend to recommend Canadian sites)

|                                                                             | <b>Overall</b> | <b>Female</b> | <b>Male</b> | <b>&lt; 35</b> | <b>35 - 44</b> | <b>45 - 54</b> | <b>55 - 64</b> | <b>65+</b> | <b>GP/FP</b> | <b>Med Spec</b> | <b>Surg Spec</b> | <b>Rural</b> | <b>Urban</b> |
|-----------------------------------------------------------------------------|----------------|---------------|-------------|----------------|----------------|----------------|----------------|------------|--------------|-----------------|------------------|--------------|--------------|
| <b>Number of respondents</b>                                                | 781            | 266           | 515         | 85             | 239            | 267            | 142            | 48         | 450          | 242             | 89               | 75           | 706          |
| <b>Prefer sites oriented to Canadian health care environment</b>            | 88.5%          | 88.3%         | 88.5%       | 87.1%          | 88.3%          | 88.8%          | 88.7%          | 89.6%      | 88.0%        | 87.2%           | 94.4%            | 90.7%        | 88.5%        |
| <b>Prefer sites that offer information in French, or are bilingual</b>      | 27.8%          | 28.6%         | 27.4%       | 29.4%          | 24.7%          | 29.2%          | 33.8%          | 14.6%      | 29.8%        | 26.0%           | 22.5%            | 26.7%        | 27.9%        |
| <b>Canadian sites are more credible</b>                                     | 9.0%           | 5.6%          | 10.7%       | 9.4%           | 6.3%           | 9.4%           | 11.3%          | 12.5%      | 8.4%         | 9.1%            | 11.2%            | 10.7%        | 8.8%         |
| <b>Canadian sites have higher quality and/or more comprehensive content</b> | 8.6%           | 8.3%          | 8.7%        | 9.4%           | 5.4%           | 7.9%           | 12.0%          | 16.7%      | 8.9%         | 7.9%            | 9.0%             | 8.0%         | 8.6%         |

Note: Percents sum to more than 100% since respondents could select more than one answer

## **CMAJ - Canadian Medical Association Journal**

### Results from the CMA's 2001 Physician Resource Questionnaire

#### **No preference for Canadian medical web sites**

Reasons for not recommending Canadian Web sites rather than American or other international Web sites  
(includes only those who said they do not tend to recommend Canadian sites)

|                                                                                                               | <b>Overall</b> | <b>Female</b> | <b>Male</b> | <b>&lt; 35</b> | <b>35 - 44</b> | <b>45 - 54</b> | <b>55 - 64</b> | <b>65+</b> | <b>GP/FP</b> | <b>Med Spec</b> | <b>Surg Spec</b> | <b>Rural</b> | <b>Urban</b> |
|---------------------------------------------------------------------------------------------------------------|----------------|---------------|-------------|----------------|----------------|----------------|----------------|------------|--------------|-----------------|------------------|--------------|--------------|
| <b>Number of respondents</b>                                                                                  | 567            | 135           | 432         | 48             | 170            | 210            | 106            | 33         | 227          | 239             | 101              | 33           | 534          |
| <b>American/international sites are more credible</b>                                                         | 6.3%           | 3.0%          | 7.4%        | 2.1%           | 3.5%           | 7.6%           | 8.5%           | 12.1%      | 3.5%         | 5.9%            | 13.9%            | 0.0%         | 6.7%         |
| <b>American/international sites have higher quality and/or more comprehensive content than Canadian sites</b> | 27.3%          | 20.7%         | 29.4%       | 25.0%          | 25.9%          | 25.2%          | 34.0%          | 30.3%      | 17.2%        | 31.8%           | 39.6%            | 18.2%        | 27.9%        |
| <b>Equivalent Canadian sites do not exist</b>                                                                 | 31.0%          | 30.4%         | 31.3%       | 31.3%          | 32.9%          | 26.7%          | 38.7%          | 24.2%      | 19.4%        | 36.4%           | 44.6%            | 24.2%        | 31.5%        |
| <b>I have not had the opportunity to search for equivalent Canadian sites</b>                                 | 16.9%          | 17.0%         | 16.9%       | 14.6%          | 17.1%          | 16.2%          | 15.1%          | 30.3%      | 17.6%        | 18.4%           | 11.9%            | 18.2%        | 16.9%        |
| <b>The content of American/international sites is appropriate for Canadian patients</b>                       | 51.5%          | 46.7%         | 53.0%       | 52.1%          | 50.0%          | 49.5%          | 55.7%          | 57.6%      | 51.5%        | 54.4%           | 44.6%            | 66.7%        | 50.6%        |
| <b>Other</b>                                                                                                  | 13.8%          | 20.0%         | 11.8%       | 16.7%          | 14.1%          | 16.2%          | 8.5%           | 9.1%       | 18.1%        | 13.0%           | 5.9%             | 9.1%         | 14.0%        |

Note: Percents sum to more than 100% since respondents could select more than one answer

## **CMAJ - Canadian Medical Association Journal**

### Results from the CMA's 2001 Physician Resource Questionnaire

#### **Continuing Medical Education**

Overall, how would you rate the quality of continuing medical education you have been able to access via technology (e.g. CD-ROMs, the Internet, videos, audiotapes)?

|                            | <b>Number of respondents</b> | <b>Very Good</b> | <b>Good</b> | <b>Fair</b> | <b>Poor</b> | <b>Very Poor</b> | <b>No Response</b> | <b>Total</b> |
|----------------------------|------------------------------|------------------|-------------|-------------|-------------|------------------|--------------------|--------------|
| <b>Overall</b>             | 2656                         | 12.4%            | 45.7%       | 24.5%       | 3.1%        | 0.7%             | 13.6%              | 100%         |
| <b>Female</b>              | 735                          | 11.0%            | 48.0%       | 21.4%       | 1.6%        | 0.5%             | 17.4%              | 100%         |
| <b>Male</b>                | 1921                         | 12.9%            | 44.9%       | 25.7%       | 3.7%        | 0.8%             | 12.1%              | 100%         |
| <b>&lt; 35</b>             | 229                          | 11.8%            | 51.1%       | 22.3%       | 1.7%        | 0.4%             | 12.7%              | 100%         |
| <b>35 - 44</b>             | 752                          | 12.2%            | 44.4%       | 26.6%       | 4.5%        | 0.9%             | 11.3%              | 100%         |
| <b>45 - 54</b>             | 908                          | 11.8%            | 47.0%       | 24.9%       | 3.1%        | 0.7%             | 12.6%              | 100%         |
| <b>55 - 64</b>             | 535                          | 13.1%            | 44.1%       | 22.8%       | 2.6%        | 0.6%             | 16.8%              | 100%         |
| <b>65+</b>                 | 232                          | 14.2%            | 43.5%       | 22.0%       | 1.3%        | 0.9%             | 18.1%              | 100%         |
| <b>GP/FP</b>               | 1231                         | 11.0%            | 45.4%       | 24.8%       | 2.5%        | 1.0%             | 15.4%              | 100%         |
| <b>Medical Specialist</b>  | 1033                         | 14.5%            | 46.0%       | 23.8%       | 3.2%        | 0.6%             | 11.9%              | 100%         |
| <b>Surgical Specialist</b> | 392                          | 11.2%            | 46.2%       | 25.3%       | 4.8%        | 0.3%             | 12.2%              | 100%         |
| <b>Rural</b>               | 231                          | 13.0%            | 44.6%       | 26.0%       | 1.7%        | 0.9%             | 13.9%              | 100%         |
| <b>Urban</b>               | 2425                         | 12.3%            | 45.9%       | 24.3%       | 3.3%        | 0.7%             | 13.5%              | 100%         |

Excludes those who said they had not accessed CME via technology

## ***CMAJ - Canadian Medical Association Journal***

Results from the CMA's 2001 Physician Resource Questionnaire

### **Call**

Do you take call and/or shared call?

|                            | <b>Number of respondents</b> | <b>Yes</b> | <b>No</b> | <b>No response</b> | <b>Total</b> |
|----------------------------|------------------------------|------------|-----------|--------------------|--------------|
| <b>Overall</b>             | 3246                         | 74.0%      | 24.5%     | 1.6%               | 100%         |
| <b>Female</b>              | 992                          | 71.8%      | 26.5%     | 1.7%               | 100%         |
| <b>Male</b>                | 2254                         | 74.9%      | 23.6%     | 1.5%               | 100%         |
| <b>&lt; 35</b>             | 284                          | 76.1%      | 23.2%     | 0.7%               | 100%         |
| <b>35 - 44</b>             | 903                          | 82.6%      | 16.7%     | 0.7%               | 100%         |
| <b>45 - 54</b>             | 1101                         | 77.7%      | 20.5%     | 1.7%               | 100%         |
| <b>55 - 64</b>             | 653                          | 69.8%      | 28.3%     | 1.8%               | 100%         |
| <b>65+</b>                 | 305                          | 41.6%      | 54.4%     | 3.9%               | 100%         |
| <b>GP/FP</b>               | 1592                         | 68.8%      | 29.5%     | 1.8%               | 100%         |
| <b>Medical Specialist</b>  | 1203                         | 76.2%      | 22.2%     | 1.6%               | 100%         |
| <b>Surgical Specialist</b> | 451                          | 86.3%      | 12.9%     | 0.9%               | 100%         |
| <b>Rural</b>               | 283                          | 79.9%      | 19.1%     | 1.1%               | 100%         |
| <b>Urban</b>               | 2963                         | 73.4%      | 25.0%     | 1.6%               | 100%         |

## **CMAJ - Canadian Medical Association Journal**

Results from the CMA's 2001 Physician Resource Questionnaire

### **Shared Call Hours**

Estimate total hours of shared call only (i.e. call that includes patients other than your own) in an average month

|                                  | <b>Overall</b> | <b>Female</b> | <b>Male</b> | <b>&lt; 35</b> | <b>35 - 44</b> | <b>45 - 54</b> | <b>55 - 64</b> | <b>65+</b> | <b>GP/FP</b> | <b>Med Spec</b> | <b>Surg Spec</b> | <b>Rural</b> | <b>Urban</b> |
|----------------------------------|----------------|---------------|-------------|----------------|----------------|----------------|----------------|------------|--------------|-----------------|------------------|--------------|--------------|
| <b>Number of respondents</b>     | 2402           | 712           | 1690        | 216            | 746            | 857            | 456            | 127        | 1096         | 917             | 389              | 226          | 2176         |
| <b>Up to 120 hours/month</b>     | 52.9%          | 55.3%         | 51.8%       | 53.7%          | 52.4%          | 54.4%          | 52.4%          | 45.7%      | 57.9%        | 52.9%           | 38.6%            | 44.2%        | 53.8%        |
| <b>121 to 180 hours/month</b>    | 21.3%          | 19.7%         | 22.0%       | 20.8%          | 24.5%          | 20.9%          | 18.9%          | 15.0%      | 18.1%        | 21.2%           | 30.8%            | 23.5%        | 21.1%        |
| <b>181 to 240 hours/month</b>    | 9.7%           | 7.7%          | 10.5%       | 13.4%          | 8.0%           | 9.6%           | 10.7%          | 9.4%       | 7.7%         | 9.1%            | 16.7%            | 14.6%        | 9.1%         |
| <b>More than 240 hours/month</b> | 5.7%           | 4.4%          | 6.3%        | 5.6%           | 5.1%           | 6.0%           | 5.9%           | 7.9%       | 5.5%         | 5.0%            | 8.2%             | 8.4%         | 5.5%         |
| <b>Missing/Zero Value</b>        | 10.4%          | 12.9%         | 9.3%        | 6.5%           | 9.9%           | 9.2%           | 12.1%          | 22.0%      | 10.9%        | 11.9%           | 5.7%             | 9.3%         | 10.5%        |
| <b>Total</b>                     | 100%           | 100%          | 100%        | 100%           | 100%           | 100%           | 100%           | 100%       | 100%         | 100%            | 100%             | 100%         | 100%         |

Note: Includes only those who take call

## **CMAJ - Canadian Medical Association Journal**

### Results from the CMA's 2001 Physician Resource Questionnaire

#### **Shared Call Type**

Shared call responsibilities

|                            | <b>Number of respondents</b> | <b>Defined group of physicians only</b> | <b>Hospital or other health care facility only</b> | <b>Other only</b> | <b>Combination</b> | <b>No Response</b> | <b>Total</b> |
|----------------------------|------------------------------|-----------------------------------------|----------------------------------------------------|-------------------|--------------------|--------------------|--------------|
| <b>Overall</b>             | 2207                         | 24.9%                                   | 44.7%                                              | 2.0%              | 21.3%              | 7.0%               | 100%         |
| <b>Female</b>              | 641                          | 29.6%                                   | 38.4%                                              | 3.3%              | 21.1%              | 7.6%               | 100%         |
| <b>Male</b>                | 1566                         | 23.0%                                   | 47.3%                                              | 1.5%              | 21.5%              | 6.7%               | 100%         |
| <b>&lt; 35</b>             | 205                          | 26.3%                                   | 42.0%                                              | 1.0%              | 23.4%              | 7.3%               | 100%         |
| <b>35 - 44</b>             | 696                          | 23.9%                                   | 45.4%                                              | 2.2%              | 21.8%              | 6.8%               | 100%         |
| <b>45 - 54</b>             | 793                          | 24.7%                                   | 45.8%                                              | 2.0%              | 21.4%              | 6.1%               | 100%         |
| <b>55 - 64</b>             | 410                          | 25.4%                                   | 42.9%                                              | 2.2%              | 21.5%              | 8.0%               | 100%         |
| <b>65+</b>                 | 103                          | 29.1%                                   | 44.7%                                              | 2.9%              | 12.6%              | 10.7%              | 100%         |
| <b>GP/FP</b>               | 993                          | 35.6%                                   | 28.1%                                              | 2.8%              | 26.9%              | 6.5%               | 100%         |
| <b>Medical Specialist</b>  | 840                          | 16.7%                                   | 61.9%                                              | 1.7%              | 14.4%              | 5.4%               | 100%         |
| <b>Surgical Specialist</b> | 374                          | 15.0%                                   | 50.3%                                              | 0.8%              | 22.2%              | 11.8%              | 100%         |
| <b>Rural</b>               | 209                          | 22.0%                                   | 48.8%                                              | 4.3%              | 14.4%              | 10.5%              | 100%         |
| <b>Urban</b>               | 1998                         | 25.2%                                   | 44.3%                                              | 1.8%              | 22.1%              | 6.6%               | 100%         |

Includes only those who take shared call



## **CMAJ - Canadian Medical Association Journal**

### Results from the CMA's 2001 Physician Resource Questionnaire

#### **Nature of Call Responsibilities**

Proportion of physicians who provide specific call responsibilities

|                            | Number of respondents | Remaining within area & carrying phone or pager |       |             | Scheduled on-site, on-call duty |       |             | Checking with answering service or voice mail |       |             |
|----------------------------|-----------------------|-------------------------------------------------|-------|-------------|---------------------------------|-------|-------------|-----------------------------------------------|-------|-------------|
|                            |                       | Yes                                             | No    | No Response | Yes                             | No    | No Response | Yes                                           | No    | No Response |
| <b>Overall</b>             | 2402                  | 82.5%                                           | 10.5% | 7.0%        | 33.6%                           | 59.4% | 7.0%        | 5.7%                                          | 87.3% | 7.0%        |
| <b>Female</b>              | 712                   | 81.0%                                           | 10.8% | 8.1%        | 34.0%                           | 57.9% | 8.1%        | 5.2%                                          | 86.7% | 8.1%        |
| <b>Male</b>                | 1690                  | 83.1%                                           | 10.4% | 6.5%        | 33.5%                           | 60.0% | 6.5%        | 5.9%                                          | 87.6% | 6.5%        |
| <b>&lt; 35</b>             | 216                   | 84.3%                                           | 10.2% | 5.6%        | 35.6%                           | 58.8% | 5.6%        | 5.1%                                          | 89.4% | 5.6%        |
| <b>35 - 44</b>             | 746                   | 83.4%                                           | 11.4% | 5.2%        | 39.1%                           | 55.6% | 5.2%        | 4.2%                                          | 90.6% | 5.2%        |
| <b>45 - 54</b>             | 857                   | 82.1%                                           | 10.2% | 7.7%        | 33.3%                           | 59.0% | 7.7%        | 4.7%                                          | 87.6% | 7.7%        |
| <b>55 - 64</b>             | 456                   | 82.9%                                           | 9.2%  | 7.9%        | 28.9%                           | 63.2% | 7.9%        | 9.4%                                          | 82.7% | 7.9%        |
| <b>65+</b>                 | 127                   | 74.8%                                           | 13.4% | 11.8%       | 17.3%                           | 70.9% | 11.8%       | 8.7%                                          | 79.5% | 11.8%       |
| <b>GP/FP</b>               | 1096                  | 81.3%                                           | 11.6% | 7.1%        | 32.7%                           | 60.2% | 7.1%        | 6.7%                                          | 86.2% | 7.1%        |
| <b>Medical Specialist</b>  | 917                   | 82.6%                                           | 10.8% | 6.7%        | 40.3%                           | 53.0% | 6.7%        | 5.1%                                          | 88.2% | 6.7%        |
| <b>Surgical Specialist</b> | 389                   | 85.6%                                           | 6.9%  | 7.5%        | 20.6%                           | 72.0% | 7.5%        | 4.1%                                          | 88.4% | 7.5%        |
| <b>Rural</b>               | 226                   | 78.3%                                           | 17.3% | 4.4%        | 36.7%                           | 58.8% | 4.4%        | 4.9%                                          | 90.7% | 4.4%        |
| <b>Urban</b>               | 2176                  | 82.9%                                           | 9.8%  | 7.3%        | 33.3%                           | 59.4% | 7.3%        | 5.7%                                          | 87.0% | 7.3%        |

Includes only those who take call

## **CMAJ - Canadian Medical Association Journal**

Results from the CMA's 2001 Physician Resource Questionnaire

### **Compensation for on-call duties**

Proportion of physicians who are compensated for specific on-call duties

|                  | <b>Compensated for being available by phone or pager?</b> |            |           |                    |              |
|------------------|-----------------------------------------------------------|------------|-----------|--------------------|--------------|
|                  | <b>Number of respondents</b>                              | <b>Yes</b> | <b>No</b> | <b>No response</b> | <b>Total</b> |
| <b>Overall</b>   | 1981                                                      | 19.9%      | 76.9%     | 3.2%               | 100%         |
| <b>Female</b>    | 577                                                       | 21.7%      | 73.8%     | 4.5%               | 100%         |
| <b>Male</b>      | 1404                                                      | 19.2%      | 78.2%     | 2.6%               | 100%         |
| <b>&lt; 35</b>   | 182                                                       | 30.2%      | 64.8%     | 4.9%               | 100%         |
| <b>35 - 44</b>   | 622                                                       | 18.8%      | 78.0%     | 3.2%               | 100%         |
| <b>45 - 54</b>   | 704                                                       | 20.0%      | 77.3%     | 2.7%               | 100%         |
| <b>55 - 64</b>   | 378                                                       | 18.5%      | 78.3%     | 3.2%               | 100%         |
| <b>65+</b>       | 95                                                        | 11.6%      | 85.3%     | 3.2%               | 100%         |
| <b>GP/FP</b>     | 891                                                       | 25.0%      | 71.8%     | 3.1%               | 100%         |
| <b>Med Spec</b>  | 757                                                       | 17.2%      | 79.3%     | 3.6%               | 100%         |
| <b>Surg Spec</b> | 333                                                       | 12.3%      | 85.3%     | 2.4%               | 100%         |
| <b>Rural</b>     | 177                                                       | 48.6%      | 48.6%     | 2.8%               | 100%         |
| <b>Urban</b>     | 1804                                                      | 17.1%      | 79.7%     | 3.2%               | 100%         |

Note: includes only those who said their call duties included being available by phone or pager

|  | <b>Compensated for being available on-site?</b> |            |           |                    |              |
|--|-------------------------------------------------|------------|-----------|--------------------|--------------|
|  | <b>Number of respondents</b>                    | <b>Yes</b> | <b>No</b> | <b>No response</b> | <b>Total</b> |
|  | 808                                             | 46.2%      | 47.8%     | 6.1%               | 100%         |
|  | 242                                             | 47.9%      | 43.8%     | 8.3%               | 100%         |
|  | 566                                             | 45.4%      | 49.5%     | 5.1%               | 100%         |
|  | 77                                              | 59.7%      | 37.7%     | 2.6%               | 100%         |
|  | 292                                             | 46.9%      | 46.6%     | 6.5%               | 100%         |
|  | 285                                             | 47.0%      | 47.4%     | 5.6%               | 100%         |
|  | 132                                             | 36.4%      | 56.8%     | 6.8%               | 100%         |
|  | 22                                              | 36.4%      | 50.0%     | 13.6%              | 100%         |
|  | 358                                             | 64.8%      | 28.8%     | 6.4%               | 100%         |
|  | 370                                             | 34.6%      | 59.5%     | 5.9%               | 100%         |
|  | 80                                              | 16.3%      | 78.8%     | 5.0%               | 100%         |
|  | 83                                              | 73.5%      | 19.3%     | 7.2%               | 100%         |
|  | 725                                             | 43.0%      | 51.0%     | 5.9%               | 100%         |

Note: includes only those who said their call duties included being available on-site

## **CMAJ - Canadian Medical Association Journal**

Results from the CMA's 2001 Physician Resource Questionnaire

### **Compensation for medical services provided while on call**

Proportion of physicians who are compensated for the provision of medical services while on call

|                            | <b>Number of respondents</b> | <b>Fee-for-service only</b> | <b>Sessional / hourly only</b> | <b>FFS + Premium only</b> | <b>Other only</b> | <b>Combination</b> | <b>No response</b> | <b>Total</b> |
|----------------------------|------------------------------|-----------------------------|--------------------------------|---------------------------|-------------------|--------------------|--------------------|--------------|
| <b>Overall</b>             | 2402                         | 51.2%                       | 7.9%                           | 9.4%                      | 7.7%              | 12.7%              | 11.0%              | 100%         |
| <b>Female</b>              | 712                          | 44.2%                       | 10.4%                          | 8.8%                      | 9.0%              | 15.0%              | 12.5%              | 100%         |
| <b>Male</b>                | 1690                         | 54.1%                       | 6.9%                           | 9.6%                      | 7.2%              | 11.8%              | 10.4%              | 100%         |
| <b>&lt; 35</b>             | 216                          | 40.3%                       | 12.5%                          | 13.9%                     | 8.8%              | 19.0%              | 5.6%               | 100%         |
| <b>35 - 44</b>             | 746                          | 48.4%                       | 8.7%                           | 10.5%                     | 7.4%              | 13.1%              | 11.9%              | 100%         |
| <b>45 - 54</b>             | 857                          | 52.2%                       | 7.4%                           | 7.9%                      | 8.1%              | 13.8%              | 10.7%              | 100%         |
| <b>55 - 64</b>             | 456                          | 55.5%                       | 6.4%                           | 8.1%                      | 8.3%              | 9.6%               | 12.1%              | 100%         |
| <b>65+</b>                 | 127                          | 64.6%                       | 4.7%                           | 9.4%                      | 3.9%              | 3.9%               | 13.4%              | 100%         |
| <b>GP/FP</b>               | 1096                         | 44.6%                       | 11.9%                          | 9.9%                      | 6.5%              | 15.7%              | 11.5%              | 100%         |
| <b>Medical Specialist</b>  | 917                          | 52.0%                       | 5.5%                           | 8.9%                      | 10.1%             | 11.6%              | 11.9%              | 100%         |
| <b>Surgical Specialist</b> | 389                          | 67.9%                       | 2.6%                           | 9.0%                      | 5.7%              | 7.2%               | 7.7%               | 100%         |
| <b>Rural</b>               | 226                          | 30.5%                       | 21.2%                          | 18.6%                     | 8.0%              | 15.5%              | 6.2%               | 100%         |
| <b>Urban</b>               | 2176                         | 53.4%                       | 6.5%                           | 8.4%                      | 7.7%              | 12.5%              | 11.5%              | 100%         |

Includes only those who take call

## **CMAJ - Canadian Medical Association Journal**

Results from the CMA's 2001 Physician Resource Questionnaire

### **On-call patients**

How many patients do you attend on an on-call basis in an average month?

|                            | <b>Number of respondents</b> | <b>Up to 10</b> | <b>11 to 40</b> | <b>More than 40</b> | <b>No Response</b> | <b>Total</b> |
|----------------------------|------------------------------|-----------------|-----------------|---------------------|--------------------|--------------|
| <b>Overall</b>             | 2402                         | 23.3%           | 36.2%           | 27.4%               | 13.0%              | 100%         |
| <b>Female</b>              | 712                          | 26.1%           | 34.1%           | 23.9%               | 15.9%              | 100%         |
| <b>Male</b>                | 1690                         | 22.1%           | 37.1%           | 28.9%               | 11.8%              | 100%         |
| <b>&lt; 35</b>             | 216                          | 25.9%           | 28.2%           | 37.5%               | 8.3%               | 100%         |
| <b>35 - 44</b>             | 746                          | 22.0%           | 34.7%           | 29.2%               | 14.1%              | 100%         |
| <b>45 - 54</b>             | 857                          | 23.0%           | 38.0%           | 26.8%               | 12.1%              | 100%         |
| <b>55 - 64</b>             | 456                          | 21.5%           | 38.8%           | 23.7%               | 16.0%              | 100%         |
| <b>65+</b>                 | 127                          | 35.4%           | 37.0%           | 17.3%               | 10.2%              | 100%         |
| <b>GP/FP</b>               | 1096                         | 25.2%           | 31.5%           | 31.4%               | 12.0%              | 100%         |
| <b>Medical Specialist</b>  | 917                          | 23.2%           | 37.2%           | 22.7%               | 16.9%              | 100%         |
| <b>Surgical Specialist</b> | 389                          | 18.3%           | 47.3%           | 27.5%               | 6.9%               | 100%         |
| <b>Rural</b>               | 226                          | 15.0%           | 26.1%           | 49.1%               | 9.7%               | 100%         |
| <b>Urban</b>               | 2176                         | 24.2%           | 37.3%           | 25.2%               | 13.4%              | 100%         |

Includes only those who take call

## **CMAJ - Canadian Medical Association Journal**

Results from the CMA's 2001 Physician Resource Questionnaire

### **Medical services provided while on call**

How many hours in an average month do you spend attending to the needs of on-call patients?

|                            | <b>Number of respondents</b> | <b>Up to 10</b> | <b>11 to 40</b> | <b>More than 40</b> | <b>No Response</b> | <b>Total</b> |
|----------------------------|------------------------------|-----------------|-----------------|---------------------|--------------------|--------------|
| <b>Overall</b>             | 2402                         | 28.1%           | 29.0%           | 26.6%               | 16.4%              | 100%         |
| <b>Female</b>              | 712                          | 30.5%           | 28.7%           | 21.8%               | 19.1%              | 100%         |
| <b>Male</b>                | 1690                         | 27.0%           | 29.2%           | 28.6%               | 15.2%              | 100%         |
| <b>&lt; 35</b>             | 216                          | 28.2%           | 30.1%           | 31.0%               | 10.6%              | 100%         |
| <b>35 - 44</b>             | 746                          | 23.7%           | 27.7%           | 29.8%               | 18.8%              | 100%         |
| <b>45 - 54</b>             | 857                          | 29.9%           | 30.3%           | 25.3%               | 14.5%              | 100%         |
| <b>55 - 64</b>             | 456                          | 29.4%           | 28.1%           | 24.1%               | 18.4%              | 100%         |
| <b>65+</b>                 | 127                          | 36.2%           | 29.1%           | 17.3%               | 17.3%              | 100%         |
| <b>GP/FP</b>               | 1096                         | 34.1%           | 27.5%           | 22.9%               | 15.5%              | 100%         |
| <b>Medical Specialist</b>  | 917                          | 25.6%           | 28.9%           | 26.5%               | 19.0%              | 100%         |
| <b>Surgical Specialist</b> | 389                          | 16.7%           | 33.7%           | 37.0%               | 12.6%              | 100%         |
| <b>Rural</b>               | 226                          | 20.4%           | 27.4%           | 36.7%               | 15.5%              | 100%         |
| <b>Urban</b>               | 2176                         | 28.9%           | 29.2%           | 25.5%               | 16.5%              | 100%         |

Includes only those who take call

## **CMAJ - Canadian Medical Association Journal**

Results from the CMA's 2001 Physician Resource Questionnaire

### **Hours worked per week**

Average hours worked per week (excluding on-call)

|                                     | <b>Overall</b> | <b>Female</b> | <b>Male</b> | <b>&lt; 35</b> | <b>35 - 44</b> | <b>45 - 54</b> | <b>55 - 64</b> | <b>65+</b> | <b>GP/FP</b> | <b>Med Spec</b> | <b>Surg Spec</b> | <b>Rural</b> | <b>Urban</b> |
|-------------------------------------|----------------|---------------|-------------|----------------|----------------|----------------|----------------|------------|--------------|-----------------|------------------|--------------|--------------|
| <b>Number of respondents</b>        | 3123           | 961           | 2162        | 279            | 874            | 1056           | 627            | 287        | 1539         | 1151            | 433              | 270          | 2853         |
| <b>Direct patient care</b>          | 35.0           | 31.0          | 36.8        | 36.5           | 35.4           | 35.6           | 35.5           | 28.8       | 35.3         | 33.4            | 38.0             | 34.6         | 35.0         |
| <b>Health facility committees</b>   | 1.3            | 1.1           | 1.3         | 0.9            | 1.3            | 1.4            | 1.3            | 0.7        | 0.8          | 1.7             | 1.7              | 1.0          | 1.3          |
| <b>Managing practice</b>            | 2.3            | 1.9           | 2.4         | 1.9            | 2.3            | 2.4            | 2.4            | 1.7        | 2.1          | 2.2             | 2.9              | 1.9          | 2.3          |
| <b>Other indirect patient care</b>  | 4.8            | 5.7           | 4.4         | 5.2            | 5.4            | 4.8            | 4.6            | 3.2        | 5.3          | 4.4             | 4.2              | 4.8          | 4.8          |
| <b>Research</b>                     | 1.8            | 1.7           | 1.8         | 1.6            | 1.8            | 2.0            | 1.8            | 1.2        | 0.8          | 3.0             | 1.9              | 1.0          | 1.9          |
| <b>Administration</b>               | 2.4            | 2.0           | 2.5         | 0.6            | 2.1            | 2.7            | 2.8            | 2.4        | 1.7          | 3.2             | 2.3              | 1.1          | 2.5          |
| <b>Teaching</b>                     | 1.6            | 1.5           | 1.6         | 1.3            | 1.6            | 1.8            | 1.6            | 0.7        | 0.8          | 2.3             | 2.4              | 0.8          | 1.6          |
| <b>Continuing medical education</b> | 3.1            | 3.0           | 3.2         | 2.8            | 3.0            | 3.1            | 3.4            | 3.3        | 3.0          | 3.3             | 3.1              | 3.0          | 3.1          |
| <b>Other</b>                        | 1.3            | 1.2           | 1.3         | 0.8            | 1.0            | 1.5            | 1.6            | 1.2        | 1.3          | 1.3             | 1.2              | 1.1          | 1.3          |
| <b>Total</b>                        | 53.4           | 49.1          | 55.3        | 51.6           | 53.8           | 55.3           | 54.9           | 43.0       | 51.1         | 54.7            | 57.7             | 49.3         | 53.7         |

Includes only those who reported hours worked

## **CMAJ - Canadian Medical Association Journal**

### Results from the CMA's 2001 Physician Resource Questionnaire

#### **Workload**

Over the last 12 months, has your workload:

|                  | <b>Number of respondents</b> | <b>Increased</b> | <b>Stayed about the same</b> | <b>Decreased</b> | <b>No Response</b> | <b>Total</b> |
|------------------|------------------------------|------------------|------------------------------|------------------|--------------------|--------------|
| <b>Overall</b>   | 3246                         | 53.7%            | 35.3%                        | 8.6%             | 2.4%               | 100%         |
| <b>Female</b>    | 992                          | 55.5%            | 32.9%                        | 10.4%            | 1.2%               | 100%         |
| <b>Male</b>      | 2254                         | 52.9%            | 36.4%                        | 7.8%             | 2.9%               | 100%         |
| <b>&lt; 35</b>   | 284                          | 51.1%            | 36.3%                        | 10.6%            | 2.1%               | 100%         |
| <b>35 - 44</b>   | 903                          | 59.8%            | 30.7%                        | 7.1%             | 2.4%               | 100%         |
| <b>45 - 54</b>   | 1101                         | 60.2%            | 32.2%                        | 5.3%             | 2.3%               | 100%         |
| <b>55 - 64</b>   | 653                          | 48.7%            | 41.0%                        | 8.4%             | 1.8%               | 100%         |
| <b>65+</b>       | 305                          | 25.6%            | 47.2%                        | 23.3%            | 3.9%               | 100%         |
| <b>GP/FP</b>     | 1592                         | 53.6%            | 35.5%                        | 8.7%             | 2.3%               | 100%         |
| <b>Med Spec</b>  | 1203                         | 55.9%            | 33.9%                        | 7.5%             | 2.7%               | 100%         |
| <b>Surg Spec</b> | 451                          | 48.3%            | 38.6%                        | 11.1%            | 2.0%               | 100%         |
| <b>Rural</b>     | 283                          | 49.8%            | 35.7%                        | 11.3%            | 3.2%               | 100%         |
| <b>Urban</b>     | 2963                         | 54.1%            | 35.3%                        | 8.3%             | 2.3%               | 100%         |

## **CMAJ - Canadian Medical Association Journal**

### Results from the CMA's 2001 Physician Resource Questionnaire

#### **Future Plans**

Proportion of physicians who, in the next two years, are highly or somewhat likely to:

|                                                            | <b>Overall</b> | <b>Female</b> | <b>Male</b> | <b>&lt; 35</b> | <b>35 - 44</b> | <b>45 - 54</b> | <b>55 - 64</b> | <b>65+</b> | <b>GP/FP</b> | <b>Med Spec</b> | <b>Surg Spec</b> | <b>Rural</b> | <b>Urban</b> |
|------------------------------------------------------------|----------------|---------------|-------------|----------------|----------------|----------------|----------------|------------|--------------|-----------------|------------------|--------------|--------------|
| <b>Number of respondents</b>                               | 3246           | 992           | 2254        | 284            | 903            | 1101           | 653            | 305        | 1592         | 1203            | 451              | 283          | 2963         |
| <b>Continue practice in the same location</b>              | 83.3%          | 85.1%         | 82.6%       | 75.7%          | 82.2%          | 88.1%          | 86.7%          | 69.5%      | 81.8%        | 84.4%           | 85.8%            | 77.4%        | 83.9%        |
| <b>Relocate within province where currently practising</b> | 7.4%           | 9.3%          | 6.6%        | 16.5%          | 11.2%          | 5.3%           | 4.1%           | 2.3%       | 8.4%         | 7.2%            | 4.2%             | 13.1%        | 6.9%         |
| <b>Relocate practice to another province</b>               | 5.3%           | 5.3%          | 5.3%        | 12.7%          | 7.5%           | 4.5%           | 2.6%           | 0.7%       | 5.4%         | 5.5%            | 4.7%             | 7.4%         | 5.1%         |
| <b>Leave Canada to practise in another country</b>         | 6.8%           | 5.2%          | 7.5%        | 10.6%          | 8.9%           | 7.4%           | 3.7%           | 1.3%       | 6.5%         | 6.8%            | 7.8%             | 5.7%         | 6.9%         |
| <b>Leave the practice of medicine</b>                      | 5.6%           | 5.2%          | 5.8%        | 3.5%           | 4.0%           | 4.3%           | 6.6%           | 15.1%      | 6.5%         | 4.3%            | 5.8%             | 6.0%         | 5.6%         |
| <b>Retire</b>                                              | 7.7%           | 4.3%          | 9.2%        | 1.1%           | 1.2%           | 2.0%           | 13.2%          | 42.0%      | 6.8%         | 7.7%            | 10.6%            | 9.2%         | 7.6%         |
| <b>Change scope of practice</b>                            | 18.8%          | 19.9%         | 18.3%       | 20.8%          | 18.6%          | 19.8%          | 19.0%          | 13.4%      | 20.7%        | 18.1%           | 13.7%            | 21.2%        | 18.6%        |

Note: Percents sum to more than 100% since respondents could indicate more than one plan as being somewhat or highly likely to occur.



## **CMAJ - Canadian Medical Association Journal**

Results from the CMA's 2001 Physician Resource Questionnaire

### **Professional Stress**

Proportion of physicians who strongly agreed or agreed with a series of statements on professional stress

|                                                                                          | <b>Overall</b> | <b>Female</b> | <b>Male</b> | <b>&lt; 35</b> | <b>35 - 44</b> | <b>45 - 54</b> | <b>55 - 64</b> | <b>65+</b> | <b>GP/FP</b> | <b>Med Spec</b> | <b>Surg Spec</b> | <b>Rural</b> | <b>Urban</b> |
|------------------------------------------------------------------------------------------|----------------|---------------|-------------|----------------|----------------|----------------|----------------|------------|--------------|-----------------|------------------|--------------|--------------|
| <b>Number of respondents</b>                                                             | 3246           | 992           | 2254        | 284            | 903            | 1101           | 653            | 305        | 1592         | 1203            | 451              | 283          | 2963         |
| <b>My workload is heavier than I would like</b>                                          | 63.7%          | 62.2%         | 64.4%       | 52.5%          | 69.5%          | 69.0%          | 64.0%          | 37.4%      | 62.7%        | 66.4%           | 60.3%            | 59.7%        | 64.1%        |
| <b>I feel my family/ personal life has suffered because I chose medicine as a career</b> | 58.1%          | 53.5%         | 60.1%       | 54.9%          | 60.4%          | 61.6%          | 56.5%          | 44.9%      | 55.9%        | 58.0%           | 65.9%            | 60.1%        | 57.9%        |
| <b>Patient expectations are unreasonably high</b>                                        | 56.8%          | 56.9%         | 56.8%       | 62.0%          | 55.9%          | 58.4%          | 56.5%          | 49.5%      | 63.6%        | 48.5%           | 55.0%            | 54.1%        | 57.1%        |
| <b>A lack of locums has affected my ability to take vacation time</b>                    | 33.2%          | 36.5%         | 31.8%       | 27.1%          | 36.8%          | 35.9%          | 31.4%          | 22.6%      | 44.7%        | 22.5%           | 21.1%            | 42.0%        | 32.4%        |
| <b>My on-call responsibilities are too onerous</b>                                       | 29.3%          | 26.0%         | 30.8%       | 26.4%          | 33.8%          | 31.6%          | 28.6%          | 12.1%      | 26.3%        | 30.2%           | 37.7%            | 32.9%        | 29.0%        |
| <b>It is difficult to get appropriate resources on behalf of my patients</b>             | 64.1%          | 65.5%         | 63.4%       | 71.5%          | 70.5%          | 65.0%          | 56.0%          | 51.8%      | 71.7%        | 52.3%           | 68.7%            | 70.7%        | 63.4%        |
| <b>Opportunities are limited if I want to change specialty or career path</b>            | 46.2%          | 42.2%         | 47.9%       | 47.2%          | 52.3%          | 49.4%          | 42.4%          | 23.6%      | 47.2%        | 45.1%           | 45.7%            | 44.2%        | 46.4%        |



## ***CMAJ - Canadian Medical Association Journal***

Results from the CMA's 2001 Physician Resource Questionnaire

### **Group Practice**

What size is your group practice? (shared patients and/or expenses)

|                  | <b>Number of respondents</b> | <b>2 physicians</b> | <b>3-5 physicians</b> | <b>6-15 physicians</b> | <b>&gt; 15 physicians</b> | <b>No response</b> | <b>Total</b> |
|------------------|------------------------------|---------------------|-----------------------|------------------------|---------------------------|--------------------|--------------|
| <b>Overall</b>   | 1588                         | 20.1%               | 36.1%                 | 28.5%                  | 9.1%                      | 6.2%               | 100%         |
| <b>Female</b>    | 563                          | 22.7%               | 35.5%                 | 26.5%                  | 6.0%                      | 9.2%               | 100%         |
| <b>Male</b>      | 1025                         | 18.6%               | 36.4%                 | 29.7%                  | 10.7%                     | 4.6%               | 100%         |
| <b>&lt; 35</b>   | 168                          | 16.7%               | 41.1%                 | 29.8%                  | 4.2%                      | 8.3%               | 100%         |
| <b>35 - 44</b>   | 491                          | 19.3%               | 39.9%                 | 27.9%                  | 5.9%                      | 6.9%               | 100%         |
| <b>45 - 54</b>   | 538                          | 20.8%               | 33.8%                 | 30.3%                  | 10.8%                     | 4.3%               | 100%         |
| <b>55 - 64</b>   | 288                          | 22.2%               | 31.6%                 | 27.1%                  | 12.2%                     | 6.9%               | 100%         |
| <b>65+</b>       | 103                          | 19.4%               | 34.0%                 | 24.3%                  | 14.6%                     | 7.8%               | 100%         |
| <b>GP/FP</b>     | 978                          | 21.2%               | 38.5%                 | 28.9%                  | 4.6%                      | 6.7%               | 100%         |
| <b>Med Spec</b>  | 421                          | 13.1%               | 31.4%                 | 29.9%                  | 20.0%                     | 5.7%               | 100%         |
| <b>Surg Spec</b> | 189                          | 30.2%               | 33.9%                 | 23.3%                  | 7.9%                      | 4.8%               | 100%         |
| <b>Rural</b>     | 165                          | 26.1%               | 46.1%                 | 18.8%                  | 0.6%                      | 8.5%               | 100%         |
| <b>Urban</b>     | 1423                         | 19.4%               | 34.9%                 | 29.7%                  | 10.0%                     | 6.0%               | 100%         |





## **CMAJ - Canadian Medical Association Journal**

### Results from the CMA's 2001 Physician Resource Questionnaire

#### **Change in overhead expenses**

During the last 12 months, have your overhead expenses:

|                  | <b>Number of Respondent</b> | <b>Increased</b> | <b>Stayed about the same</b> | <b>Decreased</b> | <b>No response</b> | <b>Total</b> |
|------------------|-----------------------------|------------------|------------------------------|------------------|--------------------|--------------|
| <b>Overall</b>   | 2703                        | 54.9%            | 37.6%                        | 2.8%             | 4.7%               | 100%         |
| <b>Female</b>    | 740                         | 52.6%            | 39.7%                        | 2.8%             | 4.9%               | 100%         |
| <b>Male</b>      | 1963                        | 55.8%            | 36.7%                        | 2.8%             | 4.6%               | 100%         |
| <b>&lt; 35</b>   | 206                         | 44.7%            | 49.0%                        | 3.9%             | 2.4%               | 100%         |
| <b>35 - 44</b>   | 730                         | 51.6%            | 41.1%                        | 3.2%             | 4.1%               | 100%         |
| <b>45 - 54</b>   | 944                         | 58.7%            | 35.0%                        | 1.7%             | 4.7%               | 100%         |
| <b>55 - 64</b>   | 549                         | 58.1%            | 33.7%                        | 2.9%             | 5.3%               | 100%         |
| <b>65+</b>       | 274                         | 52.2%            | 36.1%                        | 4.7%             | 6.9%               | 100%         |
| <b>GP/FP</b>     | 1348                        | 59.2%            | 33.6%                        | 2.9%             | 4.3%               | 100%         |
| <b>Med Spec</b>  | 933                         | 44.9%            | 46.4%                        | 2.8%             | 5.9%               | 100%         |
| <b>Surg Spec</b> | 422                         | 63.5%            | 30.6%                        | 2.6%             | 3.3%               | 100%         |
| <b>Rural</b>     | 240                         | 50.8%            | 39.2%                        | 5.0%             | 5.0%               | 100%         |
| <b>Urban</b>     | 2463                        | 55.3%            | 37.4%                        | 2.6%             | 4.7%               | 100%         |

Note: Excludes those who said they have no overhead expenses

## **CMAJ - Canadian Medical Association Journal**

Results from the CMA's 2001 Physician Resource Questionnaire

### **Change to net professional income**

During the last 12 months, has your net professional income:

|                  | <b>Number of Respondents</b> | <b>Increased</b> | <b>Stayed about the same</b> | <b>Decreased</b> | <b>No response</b> | <b>Total</b> |
|------------------|------------------------------|------------------|------------------------------|------------------|--------------------|--------------|
| <b>Overall</b>   | 3246                         | 24.7%            | 44.5%                        | 25.9%            | 4.8%               | 100%         |
| <b>Female</b>    | 992                          | 25.8%            | 46.7%                        | 23.0%            | 4.5%               | 100%         |
| <b>Male</b>      | 2254                         | 24.2%            | 43.6%                        | 27.2%            | 5.0%               | 100%         |
| <b>&lt; 35</b>   | 284                          | 38.4%            | 40.8%                        | 16.5%            | 4.2%               | 100%         |
| <b>35 - 44</b>   | 903                          | 28.0%            | 45.4%                        | 21.9%            | 4.7%               | 100%         |
| <b>45 - 54</b>   | 1101                         | 24.8%            | 45.7%                        | 25.2%            | 4.3%               | 100%         |
| <b>55 - 64</b>   | 653                          | 20.8%            | 45.3%                        | 28.6%            | 5.2%               | 100%         |
| <b>65+</b>       | 305                          | 10.2%            | 39.3%                        | 43.3%            | 7.2%               | 100%         |
| <b>GP/FP</b>     | 1592                         | 22.6%            | 44.1%                        | 28.6%            | 4.7%               | 100%         |
| <b>Med Spec</b>  | 1203                         | 28.8%            | 45.6%                        | 20.1%            | 5.4%               | 100%         |
| <b>Surg Spec</b> | 451                          | 21.1%            | 43.0%                        | 32.2%            | 3.8%               | 100%         |
| <b>Rural</b>     | 283                          | 27.2%            | 44.5%                        | 24.4%            | 3.9%               | 100%         |
| <b>Urban</b>     | 2963                         | 24.5%            | 44.5%                        | 26.1%            | 4.9%               | 100%         |

## **CMAJ - Canadian Medical Association Journal**

Results from the CMA's 2001 Physician Resource Questionnaire

### **Marital Status**

|                  | <b>Marital Status</b>        |                                             |                                                 |                    |
|------------------|------------------------------|---------------------------------------------|-------------------------------------------------|--------------------|
|                  | <b>Number of respondents</b> | <b>Single, separated, widowed, divorced</b> | <b>Married, common-law, living with partner</b> | <b>No response</b> |
| <b>Overall</b>   | 3246                         | 13.9%                                       | 83.8%                                           | 2.3%               |
| <b>Female</b>    | 992                          | 20.0%                                       | 78.7%                                           | 1.3%               |
| <b>Male</b>      | 2254                         | 11.2%                                       | 86.0%                                           | 2.8%               |
| <b>&lt; 35</b>   | 284                          | 23.7%                                       | 74.9%                                           | 1.4%               |
| <b>35 - 44</b>   | 903                          | 12.4%                                       | 85.4%                                           | 2.2%               |
| <b>45 - 54</b>   | 1101                         | 14.2%                                       | 83.5%                                           | 2.4%               |
| <b>55 - 64</b>   | 653                          | 13.6%                                       | 83.9%                                           | 2.5%               |
| <b>65+</b>       | 305                          | 8.9%                                        | 87.9%                                           | 3.3%               |
| <b>GP/FP</b>     | 1592                         | 15.2%                                       | 82.7%                                           | 2.1%               |
| <b>Med Spec</b>  | 1203                         | 13.2%                                       | 84.0%                                           | 2.8%               |
| <b>Surg Spec</b> | 451                          | 11.1%                                       | 86.9%                                           | 2.0%               |
| <b>Rural</b>     | 283                          | 12.4%                                       | 84.8%                                           | 2.8%               |
| <b>Urban</b>     | 2963                         | 14.0%                                       | 83.7%                                           | 2.3%               |

| <b>Spouse or partner a physician?</b> |            |           |
|---------------------------------------|------------|-----------|
| <b>Number of respondents</b>          | <b>Yes</b> | <b>No</b> |
| 2717                                  | 18.7%      | 81.3%     |
| 780                                   | 31.4%      | 68.6%     |
| 1937                                  | 13.7%      | 86.3%     |
| 212                                   | 30.8%      | 69.2%     |
| 771                                   | 23.0%      | 77.0%     |
| 918                                   | 19.5%      | 80.5%     |
| 548                                   | 11.3%      | 88.7%     |
| 268                                   | 9.7%       | 90.3%     |
| 1315                                  | 17.6%      | 82.4%     |
| 1010                                  | 21.0%      | 79.0%     |
| 392                                   | 16.7%      | 83.3%     |
| 240                                   | 17.6%      | 82.4%     |
| 2477                                  | 18.9%      | 81.1%     |
